# Supplementary material
Source: publisher figshare collection journal article supplement (https://sage.figshare.com/ndownloader/files/14032385)
Supplement: Supplementary file 1 [file 14032385]

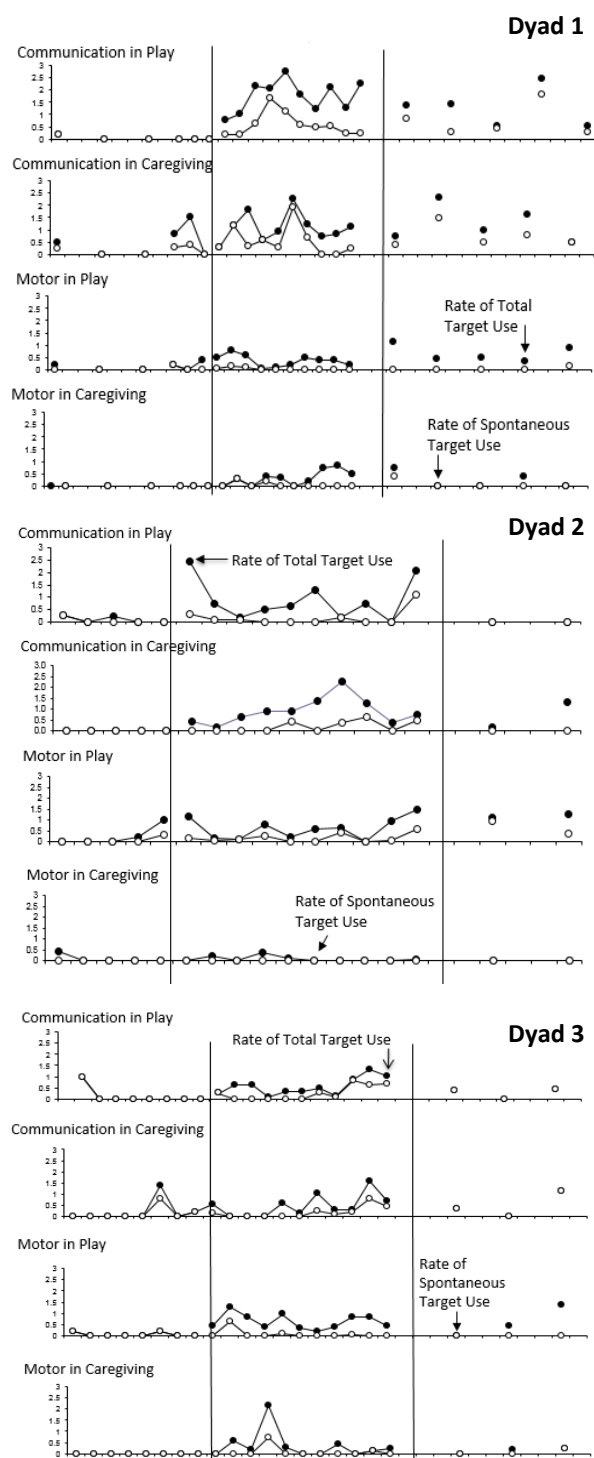

*Figure 3.* Each dyad's rate per minute of child total and spontaneous target use for communication and motor targets in play and caregiving routines.
